# Supplementary material for: Modified iPOND revealed the role of mutant p53 in promoting helicase function and telomere maintenance
Source: publisher site journal article supplement (doi:10.18632/aging.205117), 2023-10-12
Supplement: Supplementary file [file aging-v15i19-205117-supplementary-material-SD1.pdf]

## SUPPLEMENTARY FIGURE

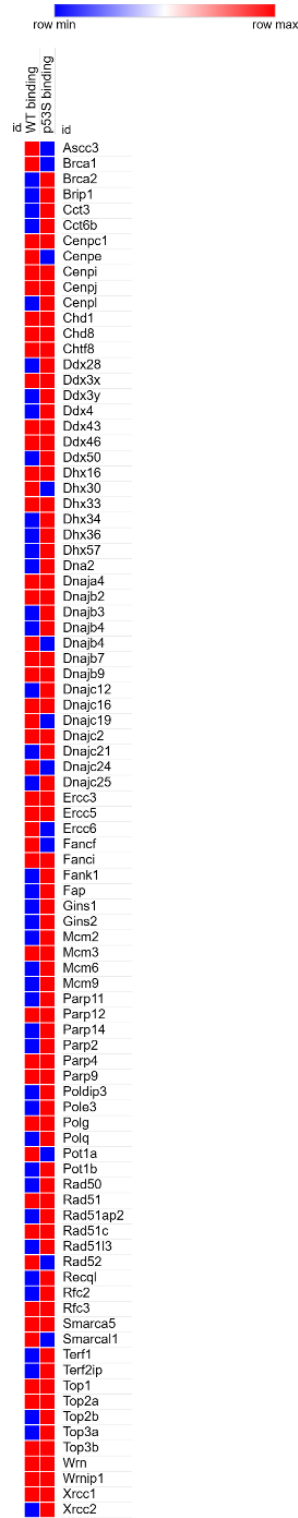

Supplementary Figure 1. The heatmap of genes involved in DNA replication pathways and DNA helicase pathways shown in Figure 1A.
